# Supplementary material for: Modulated electronic structure of Pd nanoparticles on Mg(OH)2 for selective benzonitrile hydrogenation into benzylamine at a low temperature
Source: Royal Society of Chemistry journal article supplement (doi:10.1039/d2qi01218a), 2022-01-01
Supplement: d2qi01218a1.pdf [file d2qi01218a1.pdf]

## Supporting Information

# Modulated electronic structure of Pd nanoparticles on Mg(OH)<sub>2</sub> for selective benzonitrile hydrogenation into benzylamine at low temperature

*Mingkai Zhang,<sup>a</sup> Yong Zou,<sup>b</sup> Sai Zhang,<sup>\*b,c</sup> and Yongquan Qu<sup>\*a,b</sup>*

<sup>a</sup> Frontier Institute of Science and Technology, Xi'an Jiaotong University, Xi'an, 710049, China

<sup>b</sup> Key Laboratory of Special Functional and Smart Polymer Materials of Ministry of Industry and Information Technology, School of Chemistry and Chemical Engineering, Northwestern Poly-technical University, Xi'an 710072, China

<sup>c</sup> Research & Development Institute of Northwestern Polytechnical University in Shenzhen, Shenzhen, 518057, China.

Email: zhangsai1112@nwpu.edu.cn and yongquan@nwpu.edu.cn

## Table of Contents

|                           |    |
|---------------------------|----|
| 1. Supporting Figure..... | 3  |
| 2. Supporting Table.....  | 10 |
| 3. GC/GCMS Spectrum.....  | 11 |
| 4. References.....        | 15 |

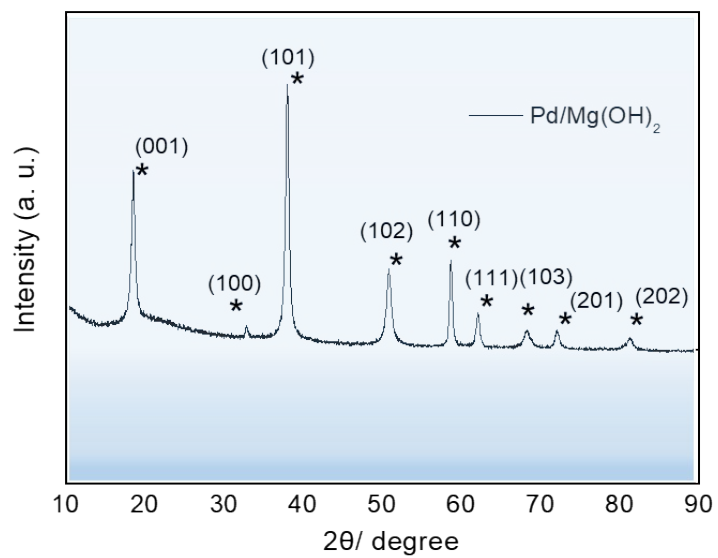

**Fig. S1.** XRD of the synthesized Mg(OH)<sub>2</sub>.

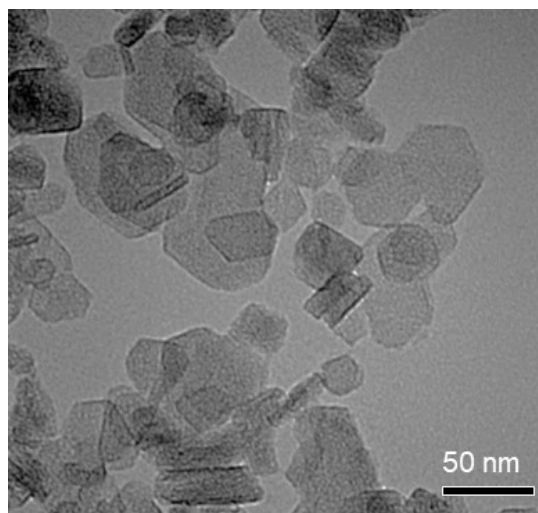

**Fig. S2.** TEM image of the synthesized Mg(OH)<sub>2</sub>.

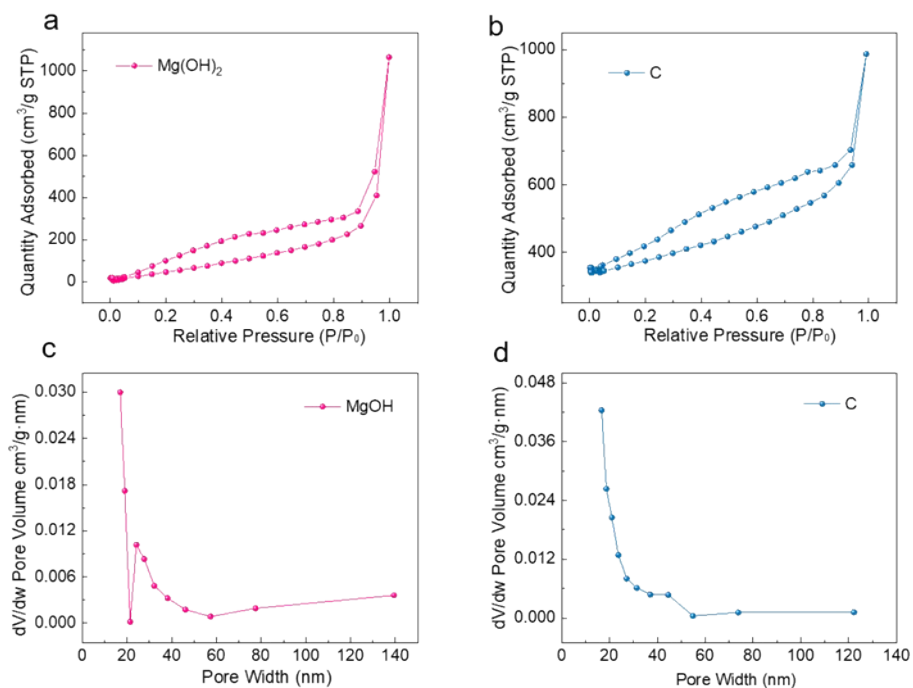

**Fig. S3.** (a) Nitrogen adsorption/desorption isotherm plot of the (a) Mg(OH)<sub>2</sub> and (b) C supports. Pore size distribution of the (c) Mg(OH)<sub>2</sub> and (d) C supports obtained from BET testing.

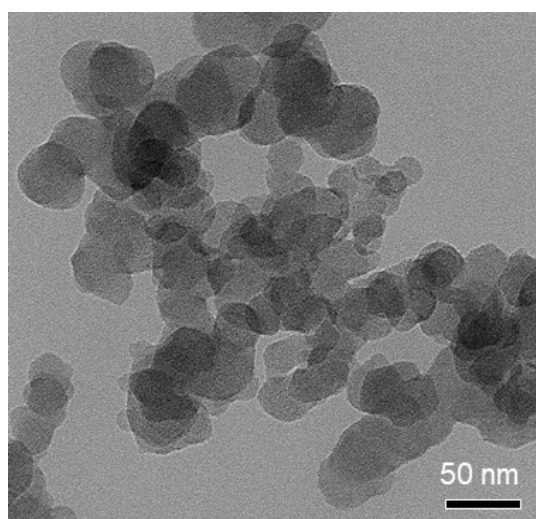

**Fig. S4.** TEM image of the synthesized carbon black.

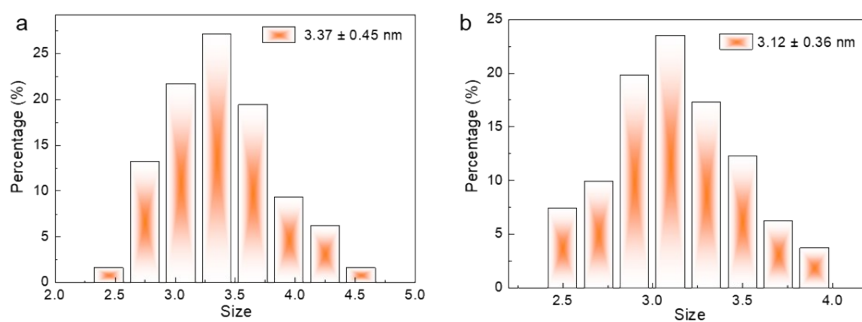

**Fig. S5.** Size distribution of (a) Pd/Mg(OH)<sub>2</sub> and (b) Pd/C catalysts.

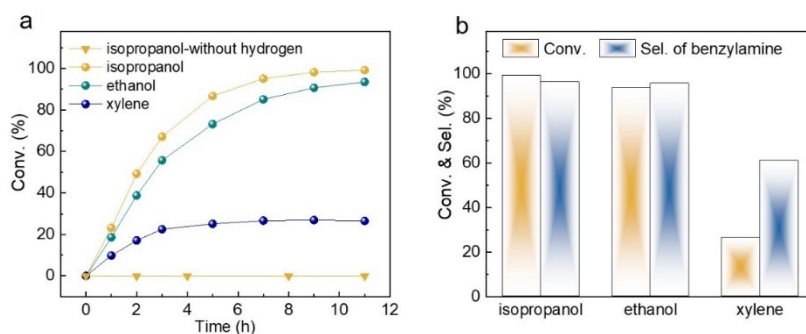

**Fig. S6.** Catalytic performance in different solvent. (a) Comparison on activity of different solvent. (b) Comparison on selectivity of different solvent at 11 h reaction.

**Reaction condition:** 0.5 mmol of benzonitrile, 2 mL of solvent, 20 mg of catalyst, 30 °C, 1 MPa of H<sub>2</sub>, or 0.5 mmol of benzonitrile, 2 mL of isopropanol, 20 mg of catalyst, 30 °C, 1 MPa of N<sub>2</sub>.

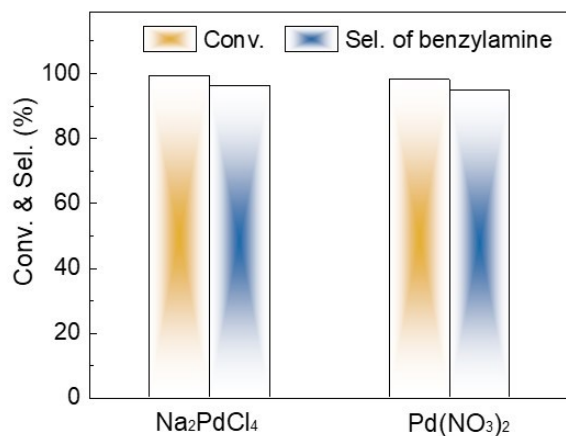

**Fig. S7.** Comparison between the different metal precursor. **Reaction conditions:** 0.5 mmol of benzonitrile, 2 mL of isopropanol, 20 mg of catalyst, 30 °C, 1 MPa of  $\text{H}_2$ .

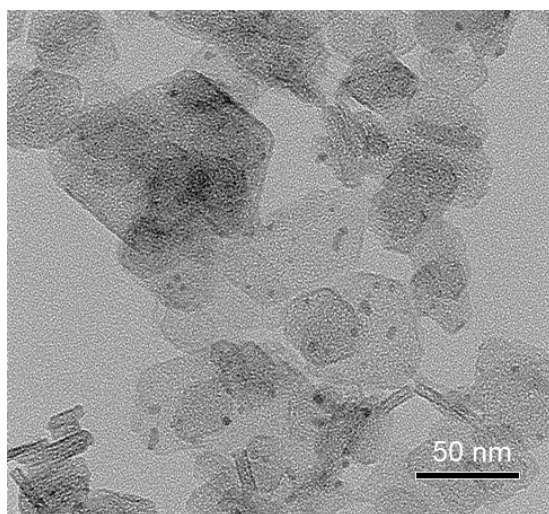

**Fig. S8.** TEM image of the used  $\text{Pd}/\text{Mg}(\text{OH})_2$ .

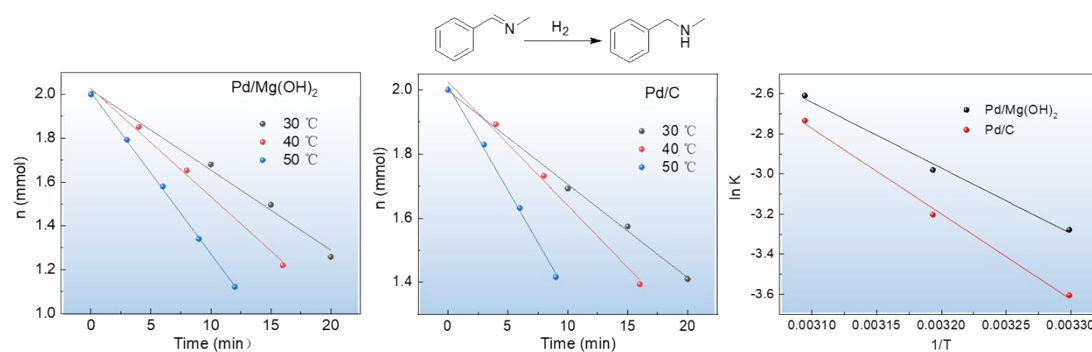

**Fig. S9.** Apparent activation energy calculation for *N*-benzylidenemethanamine hydrogenation. **Reaction condition:** 2 mmol of *N*-benzylidenemethanamine, 5 mg of catalyst, 2 mL of isopropanol, 1 MPa of H<sub>2</sub>.

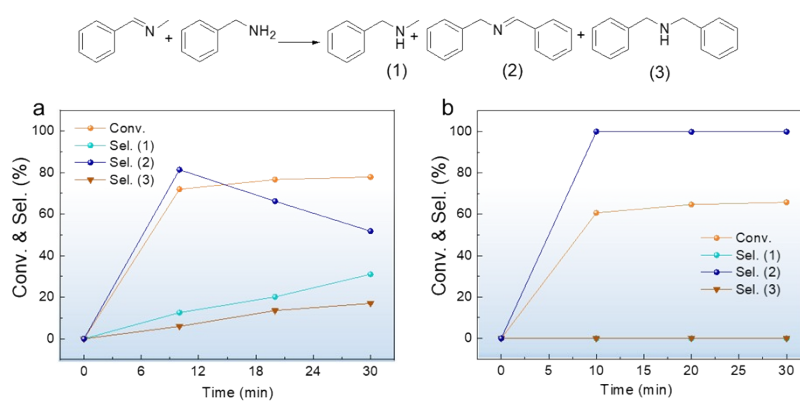

**Fig. S10.** *N*-benzylidenemethanamine hydrogenation in the presence of benzylamine on (a) Pd/Mg(OH)<sub>2</sub> and (b) Pd/C. **Reaction condition:** 1 mmol of *N*-benzylidenemethanamine, 1 mmol of benzylamine, 5 mg of catalyst, 2 mL of isopropanol, 30 °C, 1 MPa of H<sub>2</sub>.

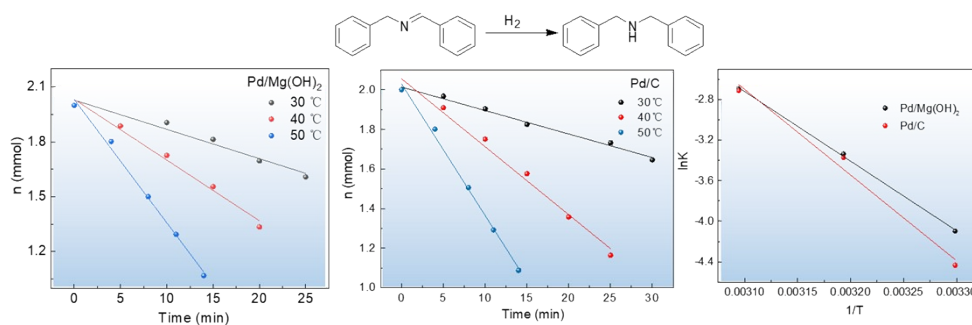

**Fig. S11.** Apparent activation energy calculation for *N*-benzylidenebenzylamine hydrogenation. **Reaction condition:** 1 mmol of *N*-benzylidenebenzylamine, 5 mg of catalyst, 2 mL of isopropanol, 1 MPa of H<sub>2</sub>.

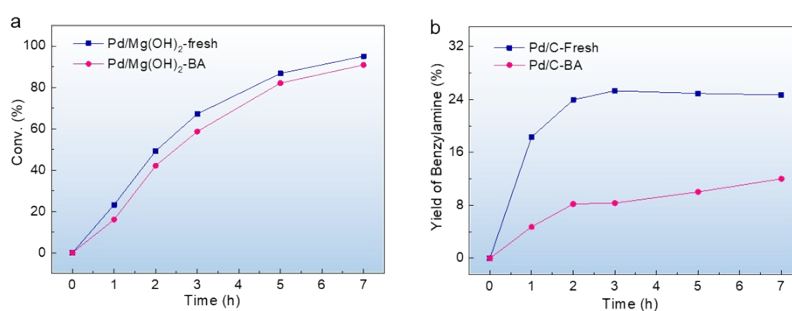

**Fig. S12.** Benzonitrile hydrogenation on (a) fresh Pd/Mg(OH)<sub>2</sub> and benzylamine treated Pd/Mg(OH)<sub>2</sub>, and (b) fresh Pd/C and benzylamine treated Pd/C. **Reaction condition:** 0.5 mmol of benzonitrile, 2 mL of isopropanol, 20 mg of catalyst, 30 °C, 1 MPa of H<sub>2</sub>.

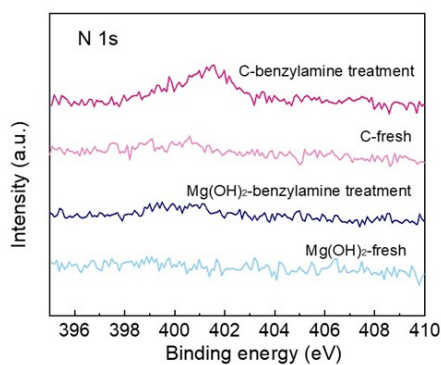

**Fig. S13.** N 1s spectrum of the fresh and the benzylamine treated supports.



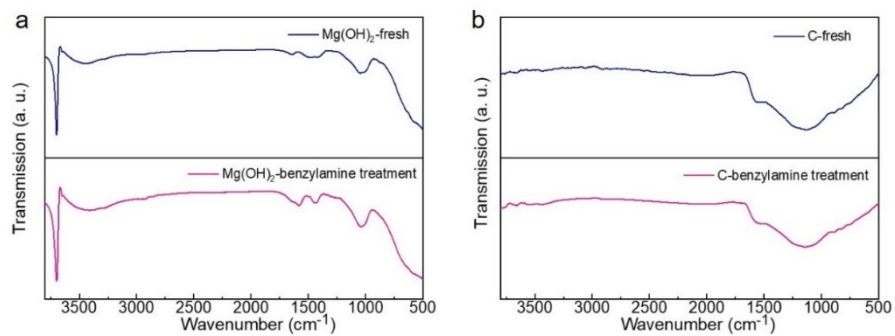

**Fig. S14.** FTIR characterization on the fresh and the benzylamine treated supports.

**Table S1.** Comparison on performance of benzonitrile hydrogenation in the reported literature

| No.       | Catalyst                                                                           | T (°C) , p <sub>H<sub>2</sub></sub> (bar) | Solvent                           | Additive                         | X <sub>BN</sub> (%) | S <sub>BA</sub> (%) | Ref.             |
|-----------|------------------------------------------------------------------------------------|-------------------------------------------|-----------------------------------|----------------------------------|---------------------|---------------------|------------------|
| 1         | Pd/C                                                                               | 30 °C, 6 bar,                             | H <sub>2</sub> O/dichloromethane  | NaH <sub>2</sub> PO <sub>4</sub> | 95.0                | 95.0                | 1                |
| 2         | Raney Ni                                                                           | 100, 40                                   | Methanol                          | None                             | n. a.               | 76.0                | 2                |
| 3         | Sn-Pt/SiO <sub>2</sub>                                                             | 60, 4                                     | Ethanol                           | None                             | 100                 | 20                  | 3                |
| 4         | Pt/Al <sub>2</sub> O <sub>3</sub>                                                  | 100, 15                                   | Methanol                          | Dibenzyl-hydrazine               | 40                  | 40                  | 4                |
| 5         | Pd/Al <sub>2</sub> O <sub>3</sub>                                                  | 80 °C, 10 bar,                            | 2-Propanol                        | None                             | 50.0                | 94.0                | 5                |
| 6         | Pd/MCM-41                                                                          | 50, 20                                    | n. a.                             | CO <sub>2</sub><br>(10MPa)       | 90.2                | 90.9                | 6                |
| 7         | Ni/Al <sub>2</sub> O <sub>3</sub>                                                  | 80, 40                                    | H <sub>2</sub> O, hexane, ethanol | CO <sub>2</sub><br>(10 MPa)      | 97.0                | 94.4                | 7                |
| 8         | Co/Phen@-Al <sub>2</sub> O <sub>3</sub> -800                                       | 85, 5                                     | i-PrOH                            | NH <sub>3</sub> (aq.)            | 98.0                | 98.0                | 8                |
| 9         | Co@NC-700                                                                          | 110, 10                                   | Methanol                          | NH <sub>3</sub> (aq.)            | n. a.               | 94.9 (yield)        | 9                |
| 10        | Co <sub>2</sub> P                                                                  | 130, 40                                   | 2-Propanol                        | NH <sub>3</sub> (aq.)            | n. a.               | 93.0 (yield)        | 10               |
| 11        | Ni@mSiO <sub>2</sub> @L<br>DH                                                      | 100, 20                                   | H <sub>2</sub> O                  | None                             | 100                 | 76.1                | 11               |
| 12        | Ru <sub>3</sub> -CO/K-Alu C                                                        | 70 °C, 1                                  | Dehydrated 1,4-dioxane/n-nonane   | None                             | >99.0               | 93.0                | 12               |
| 13        | 12Cu-MgO                                                                           | 240, H <sub>2</sub> /Benzontrile =<br>7.5 | n. a.                             | None                             | 98.0                | 70.0                | 13               |
| 14        | Pd/γ-Al <sub>2</sub> O <sub>3</sub> and<br>Pd/<br>η-Al <sub>2</sub> O <sub>3</sub> | 90, 15                                    | n. a.                             | None                             | 100                 | >90.0%              | 14               |
| 15        | Pd/Al <sub>2</sub> O <sub>3</sub>                                                  | 80, n.a.                                  | n. a.                             | None                             | 60                  | 100                 | 15               |
| <b>16</b> | <b>Pd/Mg(OH)<sub>2</sub></b>                                                       | <b>30, 10</b>                             | <b>2-Propanol</b>                 | <b>None</b>                      | <b>99.2</b>         | <b>96.1</b>         | <b>This work</b> |

## GC spectrums

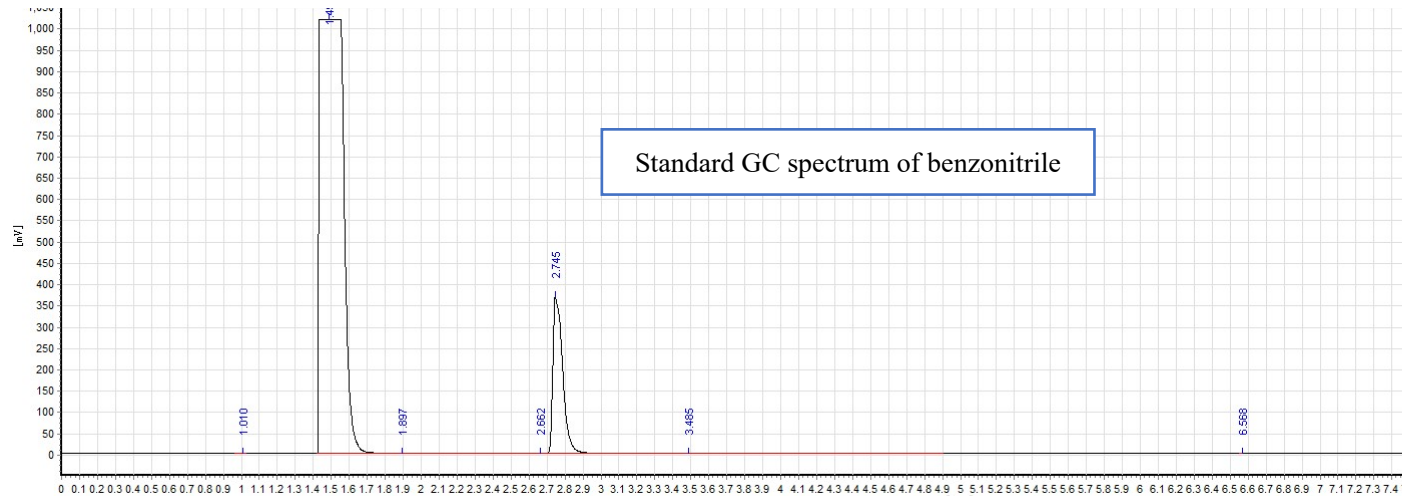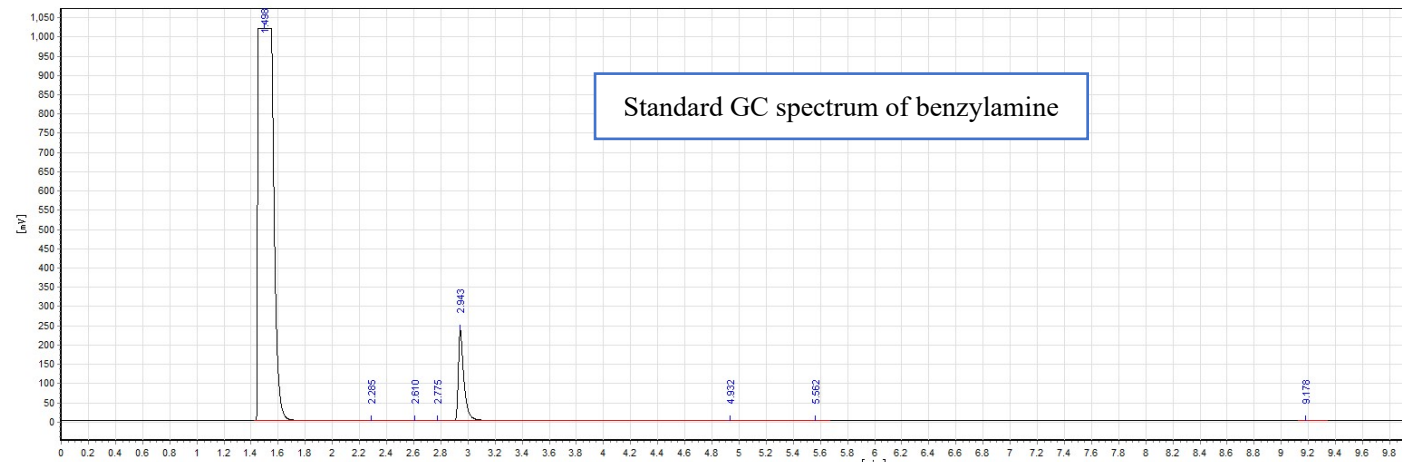

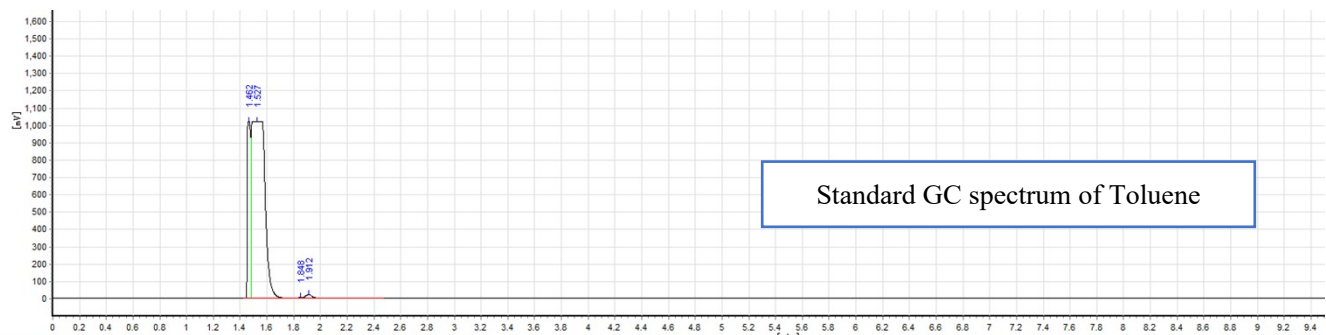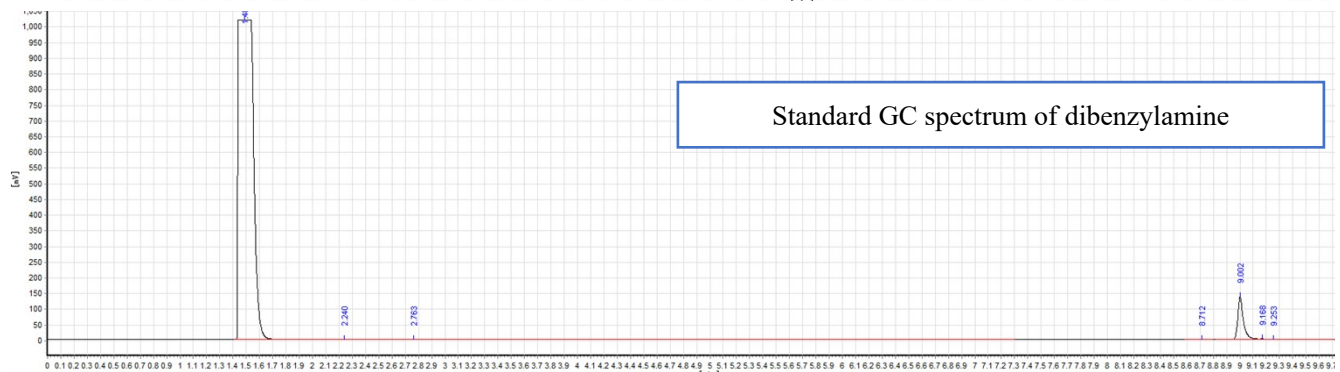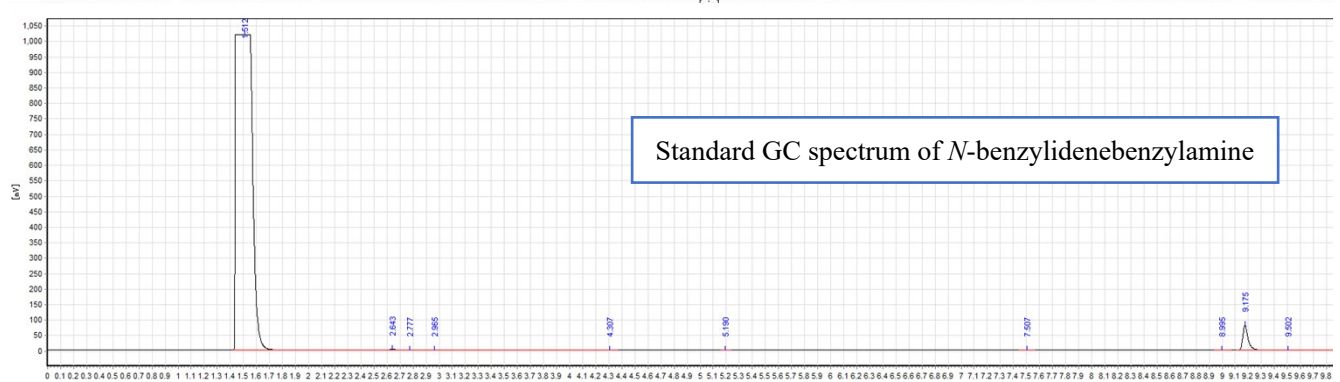

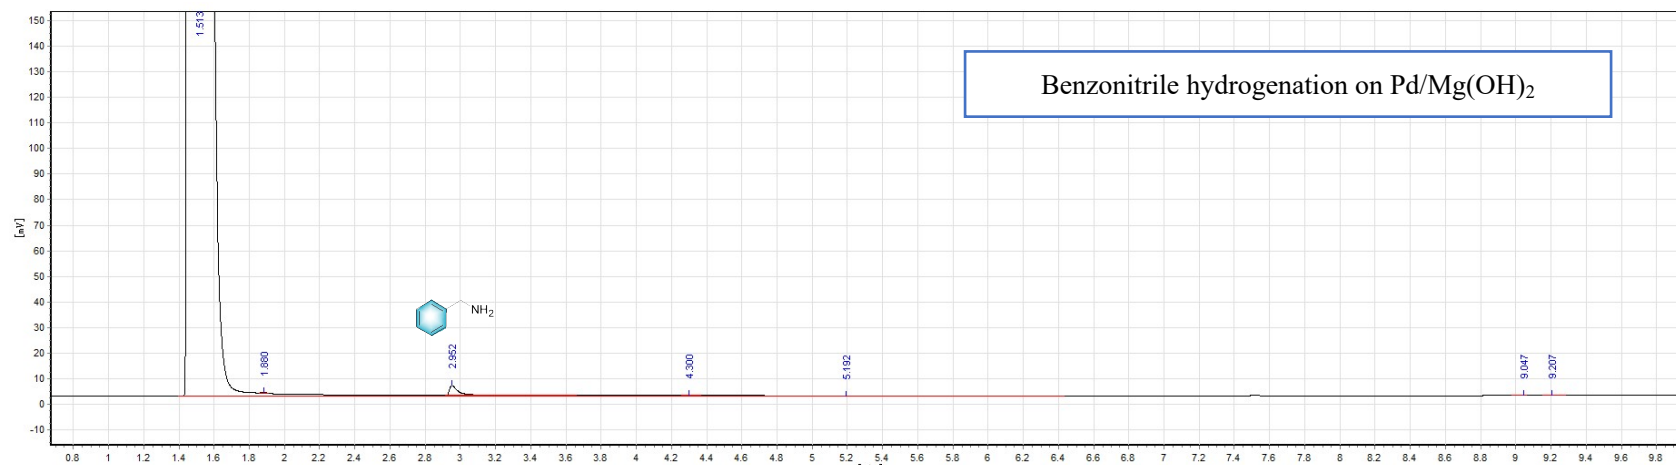

# GCMS spectrum

## GCMS standard spectrum of benzylamine

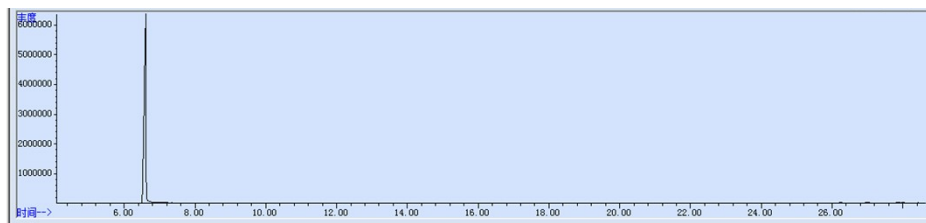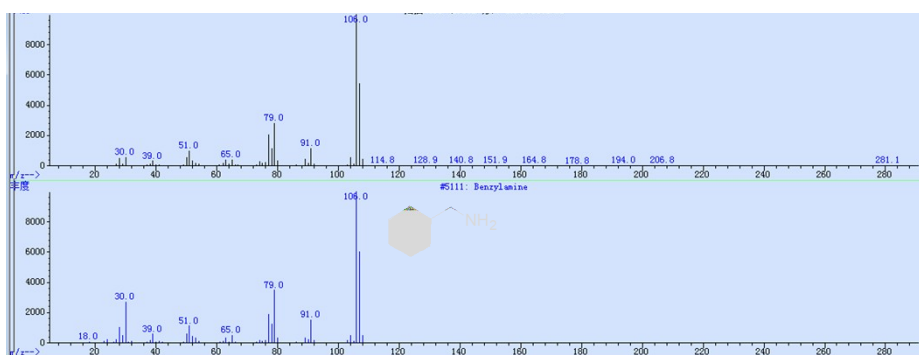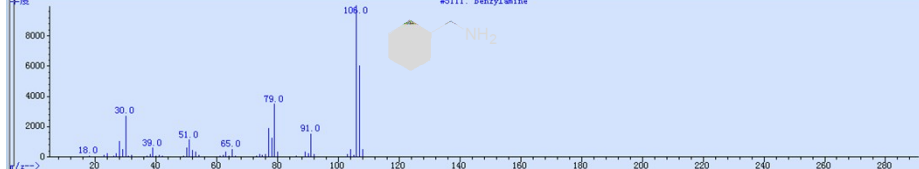

## References

1. L. Hegedűs and T. Máthé, Selective heterogeneous catalytic hydrogenation of nitriles to primary amines in liquid phase: Part I. Hydrogenation of benzonitrile over palladium, *Appl. Catal. A*, 2017, **544**, 1-9.
2. O. G., Degischer, F. Roessler, and P. Rys, Catalytic Hydrogenation of Benzonitrile over Raney Nickel: Influence of Reaction Parameters on Reaction Rates and Selectivities, *Chem. Ind.: Catal Org. React.*, 2001, **82**, 241-254.
3. O. Domínguez-Quintero, S. Martínez, Y. Henríquez, L. D'Ornelas, H. Krentzien and J. Osuna, Silica-supported palladium nanoparticles show remarkable hydrogenation catalytic activity, *J. Mol. Catal. A: Chem.*, 2003, **197**, 185-191.
4. H. Paul, S. Basu, S. Bhaduri and G.K. Lahiri, Platinum carbonyl derived catalysts on inorganic and organic supports: a comparative study. *J. Organomet. Chem.*, 2004, **689**, 309-316.
5. J.J.W. Bakker, A.G.v.d. Neut, M.T. Kreutzer, J.A. Moulijn and F. Kapteijn, Catalyst performance changes induced by palladium phase transformation in the hydrogenation of benzonitrile, *J. Catal.*, 2010, **274**, 176–191.
6. M. Chatterjee, H. Kawanami, M. Sato, T. Ishizaka, T. Yokoyama and T. Suzuki, Hydrogenation of nitrile in supercritical carbon dioxide: a tunable approach to amine selectivity, *Green Chem.*, 2010, **12**, 87-93.
7. H. Cheng, X. Meng, C. Wu, X. Shan, Y. Yu and F. Zhao, Selective hydrogenation of benzonitrile in multiphase reaction systems including compressed carbon dioxide over Ni/Al<sub>2</sub>O<sub>3</sub> catalyst, *J. Mol. Catal. A*, 2013, **379**, 72-79.
8. F. Chen, C. Topf, J. Radnik, C. Kreyenschulte, H. Lund, M. Surkus, A.E. Schneider, L. He, K. Junge and M. Beller, Stable and Inert Cobalt Catalysts for Highly Selective and Practical Hydrogenation of C≡N and C=O Bonds, *J. Am. Chem. Soc.*, 2016, **138**, 8781–8788.
9. J. Liu, W. Guo, H. Sun, R. Li, Z. Feng, X. Zhou and J. Huang, Reductive Amination of Carbonyl Compounds with Ammonia and Hydrogenation of Nitriles to Primary Amines with Heterogeneous Cobalt Catalysts, *Chem. Res. Chinese U.*, 2019, **35**, 457-462.
10. T. Mitsudome, M. Sheng, A. Nakata, J. Yamasaki, T. Mizugaki and K. Jitsukawa, A cobalt phosphide catalyst for the hydrogenation of nitriles, *Chem. Sci.* 2020, **11**, 6682-6689.

11. Y. Cao, L. Niu, X. Wen, W. Feng, L. Huo and G. Bai, Novel layered double hydroxide/oxide-coated nickel-based core-shell nanocomposites for benzonitrile selective hydrogenation: An interesting water switch, *J. Catal.*, 2016, **339**, 9-13.
12. S. Muratsugu, S. Kityakarn, F. Wang, N. Ishiguro, T. Kamachi, K. Yoshizawa, O. Sekizawa, T. Uruga and M. Tada, Formation and nitrile hydrogenation performance of Ru nanoparticles on a K-doped Al<sub>2</sub>O<sub>3</sub> surface, *Phys. Chem. Chem. Phys.*, 2015, **17**, 24791-24802.
13. R. K. Marella, K. S. Koppadi, Y. Jyothi, K. S. Rama Rao and D. R. Burri, Selective gas-phase hydrogenation of benzonitrile into benzylamine over Cu-MgO catalysts without using any additives, *New J. Chem.*, 2013, **37**, 3229-3235.
14. C. Dai, Y. Li, C. Ning, W. Zhang, X. Wang and C. Zhang, The influence of alumina phases on the performance of Pd/Al<sub>2</sub>O<sub>3</sub> catalyst in selective hydrogenation of benzonitrile to benzylamine, *Appl. Catal. A*, 2017, **545**, 97-103.
15. Y. Hao, M. Li, F. Cárdenas-Lizana and M. A. Keane, Selective Production of Benzylamine via Gas Phase Hydrogenation of Benzonitrile over Supported Pd Catalysts, *Catal. Letters*, 2015, **146**, 109-116.
